# Supplementary material
Source: PubMed Central journal article supplement (PMC3991551)
Supplement: NIHMS549678-supplement-supplement_1.pdf [file NIHMS549678-supplement-supplement_1.pdf]

## **Supplemental Table Legends**

**Supplemental Table 1. TGF $\beta$  treatment decreased SMAD3 mRNA level across gene expression studies.** Data from the GEO database was used to determine the generality of the effect of TGF $\beta$  on SMAD gene expression. The vast majority of the studies found substantial repression of SMAD3 but not SMAD2 mRNA by TGF $\beta$ .

**Supplemental Table 2. Antipsychotics alter SMAD3 responsive genes in Mudge et al. dataset.** p-values were calculated by the Nextbio algorithm for the significance of the association between the Experimental/Random Gene list (columns) and the Biogroup gene lists (rows).

**Supplemental Table 3. Antipsychotics alter SMAD3 responsive genes in Narayan et al. dataset.** p-values were calculated by the Nextbio algorithm for the significance of the association between the Experimental/Random Gene list (columns) and the Biogroup gene lists (rows).

**Supplemental Table 4. Analysis of genes with SMAD binding sites in their promoters showing altered expression in the brains of patients with schizophrenia.**

## **Supplemental Figure Legends**

**Supplemental Figure 1. Dose-response analysis of antipsychotic-induced activation of the insulin promoter in T6PNE cells. (A)** SAR of antipsychotic effects on the endogenous insulin promoter; values listed are from Figure 1A. **(B)** Dose-response analysis of antipsychotic-induced activation of the insulin promoter in T6PNE cells. Ziprasidone was autofluorescent and therefore not included. All antipsychotics were cytotoxic at 40uM. Fluphenazine, perphenazine, and trifluoperazine were cytotoxic at 20uM (n=12), error bars are SEM.

**Supplemental Figure 2. Neurotransmitter receptors and Activin-like kinase receptor family members are expressed in T6PNE and human islets. (A-B)** Microarray analysis using Illumina BeadArrays was performed on T6PNE cells and primary human islets (GSE18821)<sup>4</sup>. The y-axis represents the level of hybridization to the oligonucleotide on the array. **(A)** Neurotransmitter receptors acted on by antipsychotics were expressed at comparable levels in the T6PNE and primary human islets. **(B)** TGF $\beta$  receptor family members were expressed at comparable levels in the T6PNE and primary human islets, with ALK4/5/7, targets of SB-505124, expressed at detectable levels in both.

**Supplemental Figure 3 SB-505124 is a dose-responsive inhibitor of the T6PNE Insulin Promoter Assay.** SB-505124 shows dose responsive inhibition in the 48

hour T6PNE Ins-GFP Assay. (n=12). Error bars are SEM, \* indicates  $p < 0.05$  relative to DMSO control.

**Supplemental Figure 4. SB-505124 and TGFb Family Members show dose-responsive inhibition in the T6PNE Insulin Promoter Assay. (A-C) TGF $\beta$ 1 (A), TGF $\beta$ 2 (B), and Activin A (C) all showed dose responsive inhibition in the 48 hour T6PNE Ins-GFP Assay. (n=12). Error bars are SEM, \* indicates  $p < 0.05$  relative to DMSO control.**

## Supplemental References

1. Weintraub H, Davis R, Lockshon D, Lassar A. MyoD binds cooperatively to two sites in a target enhancer sequence: occupancy of two sites is required for activation. *Proc Natl Acad Sci U S A* 1990; **87**(15): 5623-5627.
2. Zawel L, Dai JL, Buckhaults P, Zhou S, Kinzler KW, Vogelstein B *et al.* Human Smad3 and Smad4 are sequence-specific transcription activators. *Mol Cell* 1998; **1**(4): 611-617.
3. Dennler S, Itoh S, Vivien D, ten Dijke P, Huet S, Gauthier JM. Direct binding of Smad3 and Smad4 to critical TGF beta-inducible elements in the promoter of human plasminogen activator inhibitor-type 1 gene. *EMBO J* 1998; **17**(11): 3091-3100.
4. Matsuura I DN, Wang G, He D, Long J, Liu F. . Cyclin-dependent kinases regulate the antiproliferative function of Smads. *Nature* 2004; **430**(6996): 226-231.
5. Gassmann M, Grenacher, B., Rohde, B. and Vogel, J. . Quantifying western blots: pitfalls of densitometry. *Electrophoresis* 2009; **30**(11): 1845-1855.
6. Mudge J, Miller NA, Khrebtukova I, Lindquist IE, May GD, Huntley JJ *et al.* Genomic convergence analysis of schizophrenia: mRNA sequencing reveals altered synaptic vesicular transport in post-mortem cerebellum. *PLoS One* 2008; **3**(11): e3625.
7. Kupersmidt I, Su QJ, Grewal A, Sundaresh S, Halperin I, Flynn J *et al.* Ontology-based meta-analysis of global collections of high-throughput public data. *PLoS One* 2010; **5**(9).
8. Ashburner M, Ball CA, Blake JA, Botstein D, Butler H, Cherry JM *et al.* Gene ontology: tool for the unification of biology. The Gene Ontology Consortium. *Nat Genet* 2000; **25**(1): 25-29.
9. Xie X, Lu J, Kulbokas EJ, Golub TR, Mootha V, Lindblad-Toh K *et al.* Systematic discovery of regulatory motifs in human promoters and 3' UTRs by comparison of several mammals. *Nature* 2005; **434**(7031): 338-345.
10. Matys V, Fricke E, Geffers R, Gossling E, Haubrock M, Hehl R *et al.* TRANSFAC: transcriptional regulation, from patterns to profiles. *Nucleic Acids Res* 2003; **31**(1): 374-378.
11. Narayan S, Tang B, Head SR, Gilmartin TJ, Sutcliffe JG, Dean B *et al.* Molecular profiles of schizophrenia in the CNS at different stages of illness. *Brain Res* 2008; **1239**: 235-248.

| <b>PMID/GEO Reference Series</b> | <b>Title</b>                                                                               | <b>Description</b>                                                                  | <b>Species</b> | <b>SMAD3 Fold Change</b> | <b>SMAD2 Fold Change</b> |
|----------------------------------|--------------------------------------------------------------------------------------------|-------------------------------------------------------------------------------------|----------------|--------------------------|--------------------------|
| unpublished/GSE6676              | TGFβ overexpression effect on the cornea                                                   | TGFβ expressed under Strong lens-specific promoter (Transgenic vs. Control)         | Mouse          | <b>-1.40</b>             | <b>1.38</b>              |
| 19615063/GSE6653                 | TGFβ effect on immortalized ovarian surface epithelial cell line                           | IOSE cells (TGFβ1 12hr vs untreated)                                                | Human          | <b>-2.43</b>             | <b>-1.00</b>             |
| 15477587/GSE1805                 | TGFβ effect on acute myelogenous leukemia cells                                            | M091 Cells (200 pM TGFβ 4hr vs untreated)                                           | Human          | <b>-1.30</b>             | <b>-1.14</b>             |
| 15477587/GSE1802                 | TGFβ effect on CD34+ hematopoietic stem cells                                              | CB-CD34 CD34+ hematopoietic stem cells (200 pM TGFβ 4hr vs untreated)               | Human          | <b>-1.52</b>             | <b>1.04</b>              |
| 16078232/GSE2705                 | GFAP-negative lamina cribrosa cell response to TGFβ                                        | GFAP-negative lamina cribrosa glial cell (10 ng/ml TGF-beta1 24 hours vs untreated) | Human          | <b>-2.07</b>             | <b>1.08</b>              |
| 20197308/GSE20247                | Proinsulin C-peptide and TGFβ effect on proximal tubular cell line: time course            | HK2 cells (TGFβ 48hr vs untreated)                                                  | Human          | <b>-1.49</b>             | <b>-1.12</b>             |
| 20007254/GSE17708                | TGFβ-induced epithelial-mesenchymal transition model                                       | A549 Cells (TGFβ 72hr vs. untreated)                                                | Human          | <b>-1.51</b>             | <b>1.08</b>              |
| 17178593/GSE2558                 | TGFβ effect on renal mesangial cells                                                       | MES-13 Cells (100ng/ml TGFβ 24hr vs untreated)                                      | Mouse          | <b>-1.23</b>             | <b>-1.09</b>             |
| 15571627/GSE1724                 | Idiopathic and scleroderma-associated pulmonary fibrosis derived fibroblasts response-TGFβ | Adult Lung Fibroblasts, Normal Tissue (4ng/ml 4hr vs untreated)                     | Human          | <b>-1.93</b>             | <b>-1.23</b>             |
| 19701206 /GSE17518               | mRNA expression profile in IMR-90 cells in response to TGFβ                                | IMR90 fetal lung mesenchymal cells (2ng/ml TGF-beta1 48hr vs untreated)             | Human          | <b>-6.82</b>             | <b>-1.05</b>             |
| Unpublished/GSE23952             | Expression data from TGFβ treated Panc-1 pancreatic adenocarcinoma cell line               | Panc-1 cells (serum-starved, 24 h, 5 ng/mL TGFbeta1 48hr vs untreated)              | Human          | <b>-1.98</b>             | <b>-1.42</b>             |

**Supplemental Table 1. TGFβ treatment decreased SMAD3 mRNA level across gene expression studies.**

|                                                | <b>Genes Altered in AP Treated Patients (1291 genes)</b> | <b>Random Gene Lists (1291 genes)</b> | <b>Genes Altered in Patients Taking APs Most Potent in T6PNE (819 genes)</b> | <b>Random Gene Lists (819 genes)</b> |
|------------------------------------------------|----------------------------------------------------------|---------------------------------------|------------------------------------------------------------------------------|--------------------------------------|
| <b>Golgi Apparatus</b>                         | 0.00037                                                  | 0.19                                  | 0.11                                                                         | 0.25                                 |
| <b>Post-Golgi Vesicle-Mediated Transport</b>   | 0.0089                                                   | 0.38                                  | 0.03                                                                         | 0.79                                 |
| <b>Gene Promoters with SMAD1 Binding Sites</b> | 0.11                                                     | 0.16                                  | 0.18                                                                         | 0.28                                 |
| <b>Gene Promoters with SMAD3 Binding Sites</b> | 0.054                                                    | 0.28                                  | 0.0096                                                                       | 0.14                                 |

**Supplemental Table 2. Antipsychotics alter SMAD3 responsive genes in Mudge et al. dataset.**

|                                                | <b>Genes Altered in AP Treated Patients (Narayan et al., 415 genes)</b> | <b>Random Gene Lists (415 genes)</b> | <b>Genes Altered in Patients Taking APs Most Potent in T6PNE (Narayan et al., 732 genes)</b> | <b>Random Gene Lists (732 genes)</b> |
|------------------------------------------------|-------------------------------------------------------------------------|--------------------------------------|----------------------------------------------------------------------------------------------|--------------------------------------|
| <b>Gene Promoters with SMAD1 Binding Sites</b> | 0.18                                                                    | 0.12                                 | 0.16                                                                                         | 0.23                                 |
| <b>Gene Promoters with SMAD3 Binding Sites</b> | 0.071                                                                   | 0.26                                 | 0.043                                                                                        | 0.30                                 |

**Supplemental Table 3. Antipsychotics alter SMAD3 responsive genes in Narayan et al. dataset.**





|          |          |
|----------|----------|
| ELK3     | DCTN2    |
| ELN      | DLX3     |
| EN1      | DMPK     |
| ENTPD1   | DOCK9    |
| EVX1     | DUSP3    |
| FAM5B    | EDA      |
| FAM70A   | EDN1     |
| FAM76B   | EIF3J    |
| FBXW7    | ELOVL1   |
| FGFR1OP2 | EMID1    |
| FHL3     | EPB41    |
| FLJ39739 | EPHX4    |
| GABRB1   | ERG      |
| GARNL3   | ESRRG    |
| GATA1    | EYA1     |
| GDNF     | EYA4     |
| GLRA1    | FAP      |
| GPR3     | FGF11    |
| GPRC5D   | FGF14    |
| GRHL3    | FGF23    |
| GRIN2D   | FGF7     |
| GTF2A1   | FOXB1    |
| H3F3B    | FOXP1    |
| HCLS1    | FRY      |
| HNRNPA1  | FXR1     |
| HNRNPUL1 | FZD1     |
| HOXB1    | GABRE    |
| HOXC13   | GADD45G  |
| HPCA     | GIT1     |
| HPX      | GPC3     |
| HTRA2    | GRIN2D   |
| IGF2BP3  | GRRP1    |
| IGFBP5   | H1FO     |
| IL1RAPL1 | HAPLN2   |
| IRX2     | HCRT     |
| JAKMIP2  | HES7     |
| JMJD1C   | HEXIM1   |
| JUB      | HMCN1    |
| KCNA1    | HMGB1    |
| KCNC1    | HOXB1    |
| KCNH2    | HOXC4    |
| KCNN4    | HOXC6    |
| KCNQ5    | HS3ST2   |
| KIAA0182 | IL17RB   |
| KIAA0913 | IRX5     |
| KIAA1967 | ITGAE    |
| KLK14    | ITIH3    |
| LAG3     | JARID2   |
| LAMA3    | JMJD1C   |
| LAMB3    | JUB      |
| LCOR     | KCNJ8    |
| LEFTY1   | KCTD15   |
| LEFTY2   | KDM3A    |
| LHX6     | KIAA1191 |
| LIN28    | KIAA1468 |
| LRRTM3   | KIRREL   |
| LTBP1    | KLF7     |
| MAGED2   | LAMC2    |
| MBNL1    | LCOR     |
| MEX3B    | LHX6     |
| MEX3C    | LIMD2    |
| MLLS     | LIN28    |
| MRPS18B  | LOX      |
| MYBPC2   | LRP2     |
| MYH6     | LRRC48   |
| MYL6B    | LTBP1    |

|          |          |
|----------|----------|
| NCDN     | LUC7L3   |
| NCKAP5   | MAP2     |
| NDUFS4   | MAP7D1   |
| NEUROD1  | MARCKSL1 |
| NFE2     | MEIS1    |
| NOTCH3   | MFAP4    |
| NRGN     | MN1      |
| NRP1     | MORF4L2  |
| NSD1     | MRC2     |
| NXPH4    | MTMR4    |
| ONECUT2  | MYCL1    |
| OTX2     | MYT1     |
| PAFAH2   | NAT8L    |
| PDGFB    | NDUFS2   |
| PHC1     | NIN      |
| PHF12    | NKX2-1   |
| PHF17    | NLGN2    |
| PI4KB    | NNAT     |
| PIAS3    | NOS3     |
| PIK3CG   | NR2F2    |
| PIK3R1   | NRXN3    |
| PIM1     | NTRK3    |
| PLA2G2F  | NXPH4    |
| PMEPA1   | NYX      |
| POLD4    | OLIG3    |
| POLG     | OTX2     |
| PPP1R10  | PABPC5   |
| PPP1R15B | PAK3     |
| PRMT1    | PAX2     |
| PRMT3    | PAX3     |
| PRX      | PDE4D    |
| PSD      | PDLM2    |
| PSD4     | PELI3    |
| PSMB1    | PFKFB1   |
| PSMB2    | PHF15    |
| PTCH1    | PIK3R3   |
| PTGFRN   | PITX3    |
| RAB5C    | PLCXD2   |
| RARA     | PLEKHA6  |
| RASAL1   | PLEKHH2  |
| RBM12    | POU3F4   |
| RBMS1    | POU4F1   |
| RDH10    | PPP3CB   |
| RGL2     | PRLHR    |
| RHCE     | PTPN6    |
| RHD      | PTPN7    |
| RHOG     | PURA     |
| RIMS1    | PVRL1    |
| RNF144B  | R3HDM1   |
| RNF152   | RAI1     |
| ROCK1    | RARB     |
| RORA     | RASL11B  |
| RPL7     | RFX4     |
| RPP21    | RFX5     |
| RPRD2    | RIMS1    |
| RPS14    | RLIM     |
| RRM1     | RNF19B   |
| RTCD1    | RUFY3    |
| RUNX2    | RUSC1    |
| S1PR1    | S100A14  |
| SEMA4A   | S100A16  |
| SERPIN5  | SAV1     |
| SERTAD3  | SCRG1    |
| SGCD     | SERINC2  |
| SH3KBP1  | SHANK1   |
| SHC1     | SIAH3    |

|         |            |
|---------|------------|
| SIPA1   | SIPA1      |
| SKAP1   | SKIL       |
| SLAIN1  | SKP1       |
| SLC25A4 | SLC4A2     |
| SLC26A9 | SLC6A9     |
| SLC4A2  | SMAD6      |
| SLC8A3  | SMG5       |
| SMARCA1 | SMPX       |
| SMG1    | SMTN       |
| SMYD2   | SNIP       |
| SNPH    | SOX14      |
| SNX12   | SSBP3      |
| SOX21   | ST5        |
| SP3     | ST6GALNAC5 |
| SPOP    | STX16      |
| SPTAN1  | SYNPO      |
| SRRM1   | SYT7       |
| ST18    | TAF6L      |
| STMN1   | TEAD3      |
| STX5    | TFAP2D     |
| SUFU    | TFDP2      |
| SYT11   | TGFB2      |
| SYVN1   | TGIF2      |
| TAGLN   | THBS2      |
| TARBP2  | TIMP4      |
| TBP     | TLX1       |
| TEAD1   | TMEM164    |
| TENC1   | TMEM79     |
| THADA   | TNRC4      |
| TIAF1   | TOP1       |
| TINAGL1 | TRAIP      |
| TPR     | TSHZ3      |
| TSHZ1   | TXNDC12    |
| TSSK3   | WNT10B     |
| TWIST1  | WNT8B      |
| UBE2Q1  | ZADH2      |
| UBE4B   | ZDHHC22    |
| UBXN10  | ZEB2       |
| UFD1L   | ZHX2       |
| VEGFA   | ZMYND17    |
| WBP2NL  | ZMYND8     |
| WDR81   | ZNF654     |
| WT1     | ZRANB1     |
| XPO4    |            |
| YBX2    |            |
| ZEB2    |            |
| ZFP91   |            |
| ZNF324B |            |
| ZNF362  |            |
| ZNF366  |            |
| ZNF462  |            |
| ZNF532  |            |
| ZNF827  |            |
| ZSCAN20 |            |

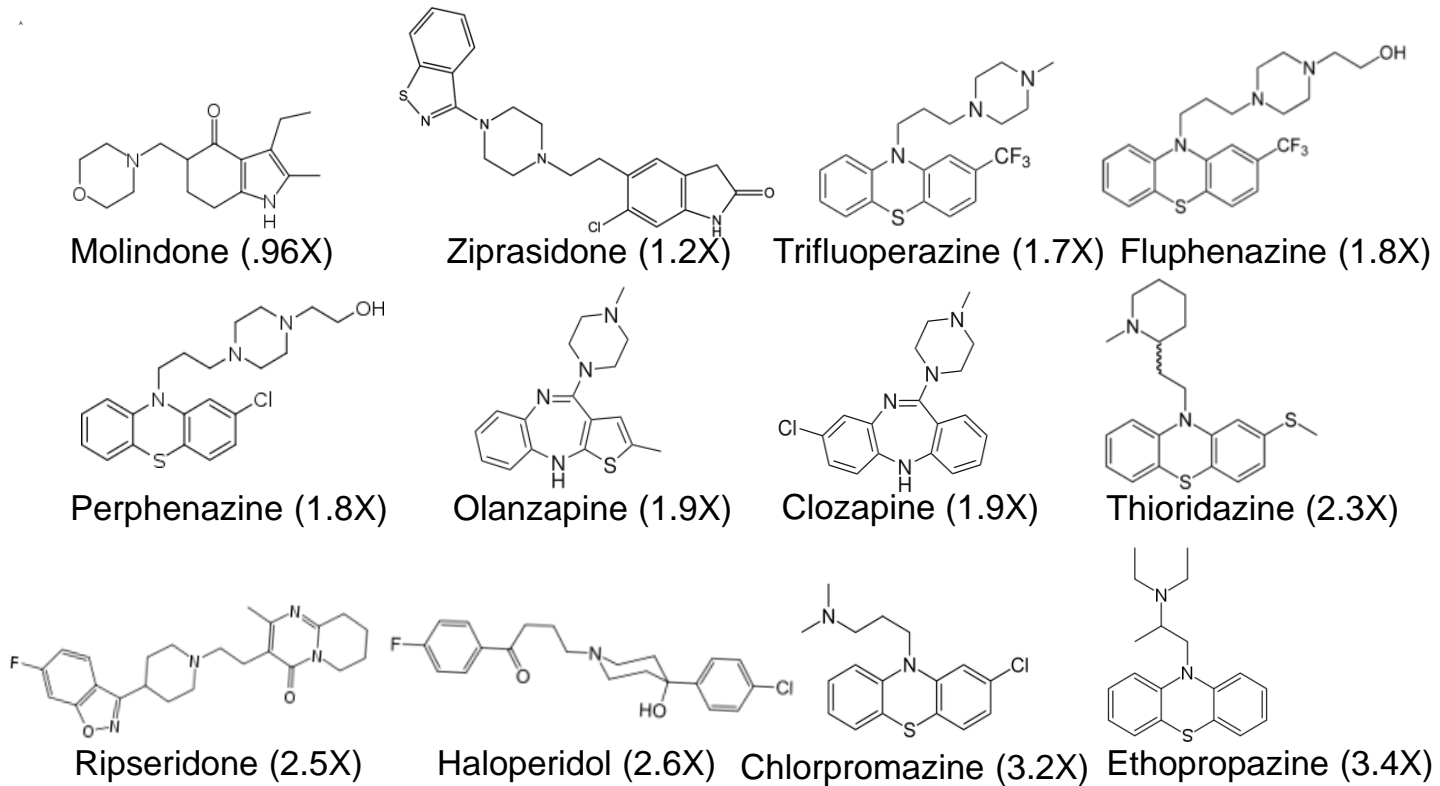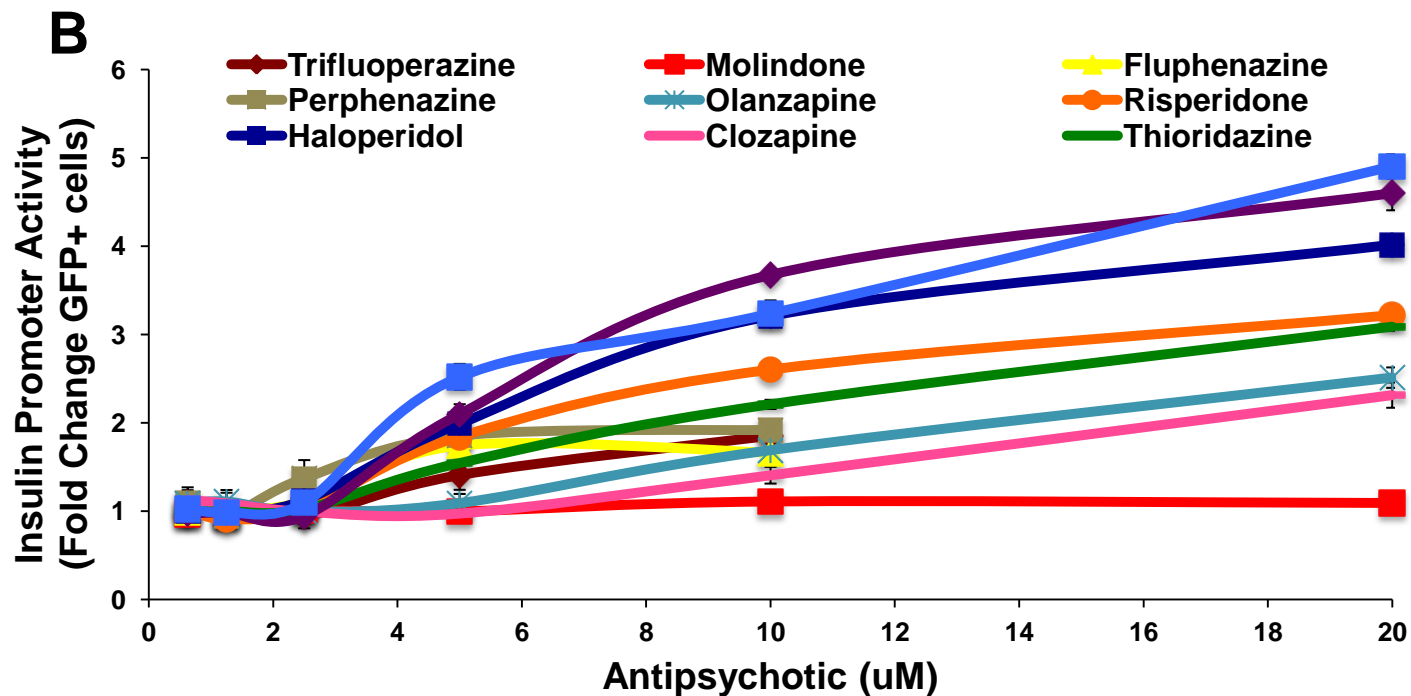

**Supplemental Figure 1. Dose-response analysis of antipsychotic-induced activation of the insulin promoter in T6PNE cells.**

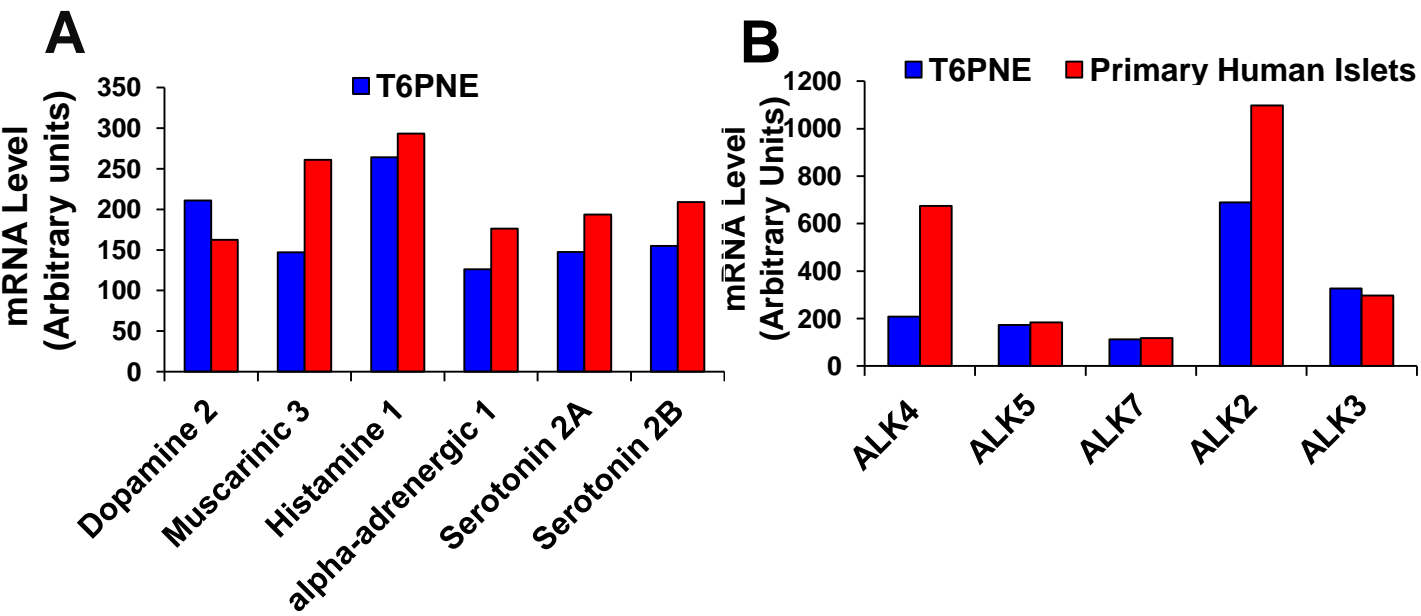

**Supplemental Figure 2. Neurotransmitter receptors and Activin-like kinase receptor family members are expressed in T6PNE and human islets.**

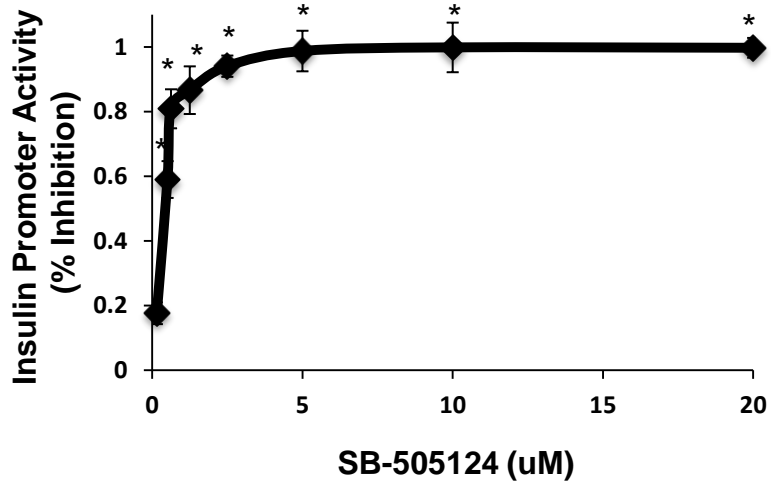

**Supplemental Figure 3. SB-505124 is a dose-responsive inhibitor of the T6PNE Insulin Promoter Assay**

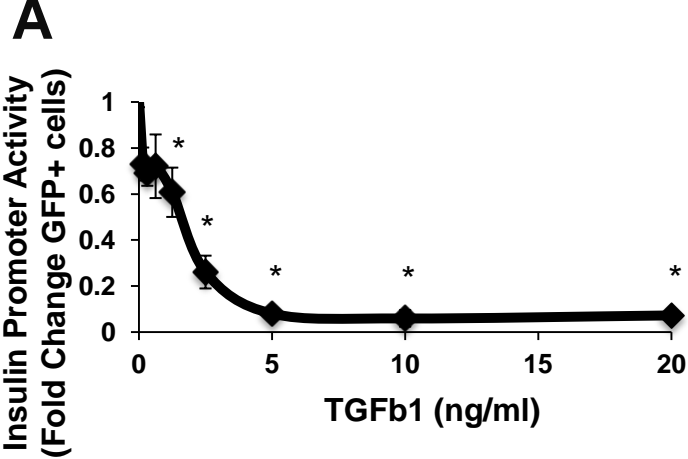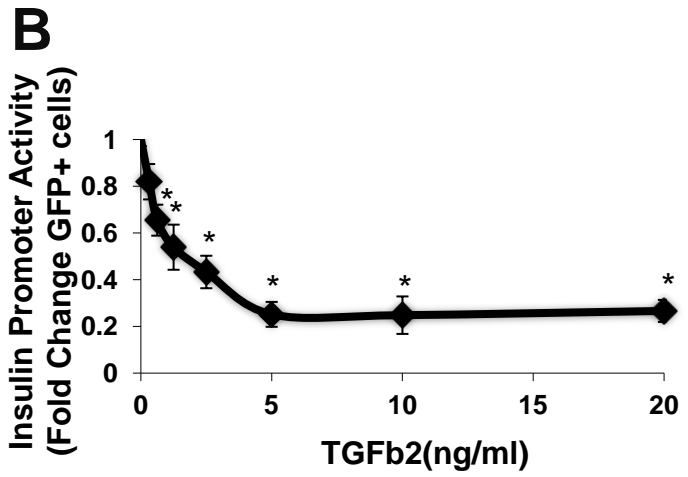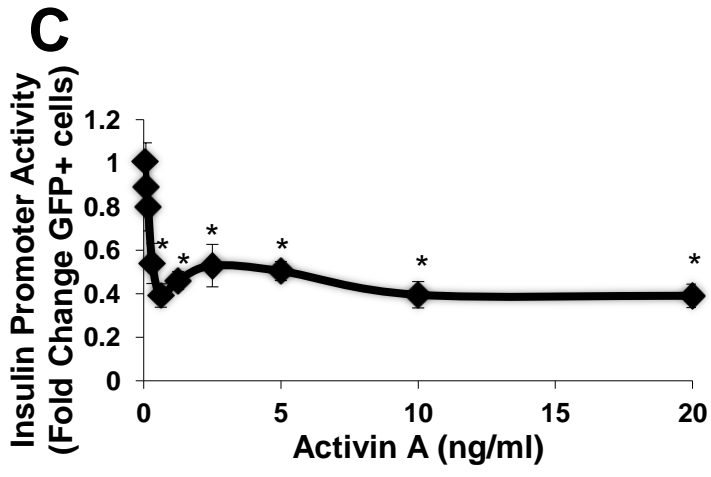

Supplemental Figure 4. TGFb Family Members show dose-responsive inhibition in the T6PNE Insulin Promoter Assay.
